# Supplementary material for: Mitigation of Eutrophication in a Shallow Lake: The Influences of Submerged Macrophytes on Phosphorus and Bacterial Community Structure in Sediments
Source: MDPI journal article supplement (doi:10.3390/su13179833), 2021-09-01
Supplement: s1 [file s1]

Archive with 1 entries (1 files):
- sustainability-1296037-supplementary.pdf
