# Supplementary material for: Mitigation of Eutrophication in a Shallow Lake: The Influences of Submerged Macrophytes on Phosphorus and Bacterial Community Structure in Sediments
Source: MDPI journal article supplement (doi:10.3390/su13179833), 2021-09-01
Supplement: s1 [file s1 › sustainability-1296037-supplementary.pdf]

*Supplementary material for*

# Mitigation of shallow aquatic eutrophication: The influences of submerged macrophytes on phosphorus load and bacterial community structure in sediments

Juanjuan Wang<sup>1</sup>, Siwen Zhang<sup>1</sup>, Tianyang Que<sup>1</sup>, Anna H. Kaksonen<sup>2,3</sup>, Xiaoqing Qian<sup>1</sup>, Xuliang Zhuang<sup>4,5</sup>, Tsing Bohu<sup>6,7\*</sup>

<sup>1</sup> Yangzhou University, Yangzhou, 225127, China; wangjuanjuan@yzu.edu.cn(J.W.); 1924694308@qq.com(S.Z.); 1556124137@qq.com (T.Q.); qianxq@qq.com (X.Q.)

<sup>2</sup> CSIRO Land and Water, Private Bag No.5, Wembley, WA, 6913, Australia; anna.kaksonen@csiro.au (A.H.K.)

<sup>3</sup> School of Biomedical Sciences, University of Western Australia, Crawley, WA, 6009, Australia

<sup>4</sup> Research Center for Eco-Environmental Sciences, Chinese Academy of Sciences, Beijing 100085, China; xlzhuang@rcees.ac.cn (X.Z.)

<sup>5</sup> University of Chinese Academy of Sciences, Beijing 100049, China

<sup>6</sup> State Key Laboratory of Lunar and Planetary Sciences, Macau University of Science and Technology, Taipa, Macau; e-mail: qhu@must.edu.mo (T.B.)

<sup>7</sup> CSIRO Mineral Resources, Australian Resources and Research Centre, Kensington, WA 6151, Australia

\*Corresponding author: qhu@must.edu.mo

**Table S1** The correlation of sediment bacterial community composition and associated environmental factors by canonical correlation analysis (CCA) and envfit analysis.

| Sample type     | Parameter | CCA1    | CCA2    | $r^2$  | $p$   |
|-----------------|-----------|---------|---------|--------|-------|
| Overlying water | pH        | -0.8302 | 0.5575  | 0.3018 | 0.001 |
|                 | DO        | -0.6987 | 0.7155  | 0.2279 | 0.004 |
| Sediment        | Fe(III)   | -0.0323 | -0.9995 | 0.3291 | 0.001 |
|                 | Fe(II)    | -0.8312 | -0.556  | 0.4554 | 0.001 |
|                 | Fe-P      | -0.9487 | -0.3162 | 0.286  | 0.001 |
|                 | OM        | 0.9224  | -0.3861 | 0.2178 | 0.012 |
|                 | TP        | 0.8338  | 0.5521  | 0.0249 | 0.600 |

CCA1 and CCA2 denote correlations between the environmental factors and the two CCA axes,  $r^2$  denotes the determination coefficients of the environmental factors on the distribution of bacterial communities, and  $p$  denotes the statistical significance. DO, dissolved oxygen; Fe(II), ferrous iron; Fe(III), ferric iron; Fe-P, iron-bound phosphorus; OM, organic matter; and TP, total phosphorus.

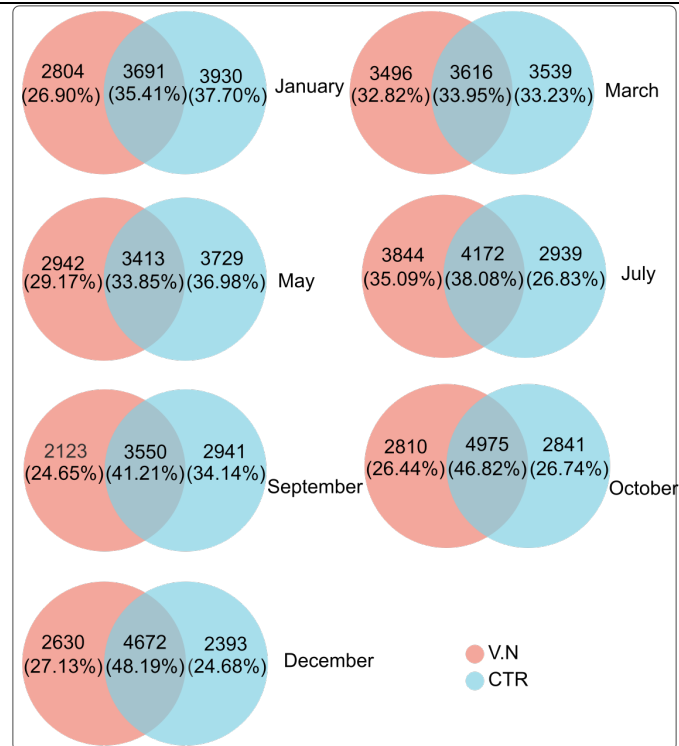

**Figure S1** Venn diagram showing the distribution of operational taxonomic units between lake sediment samples in the presence (V.N) and absence (CTR) of *V. natans* over the course of one year.

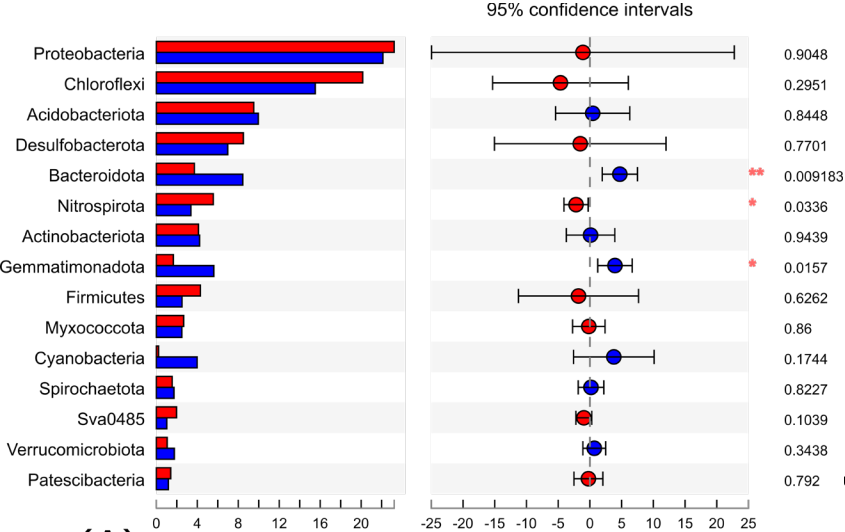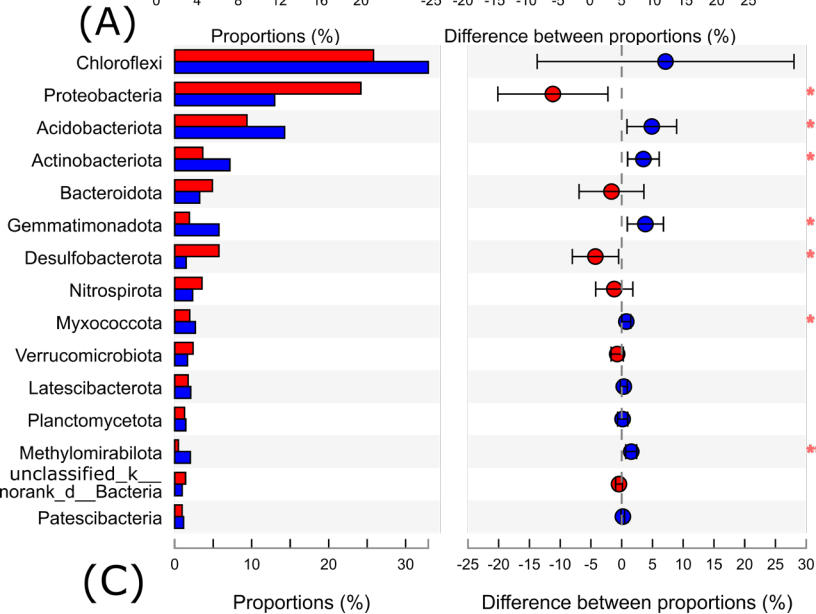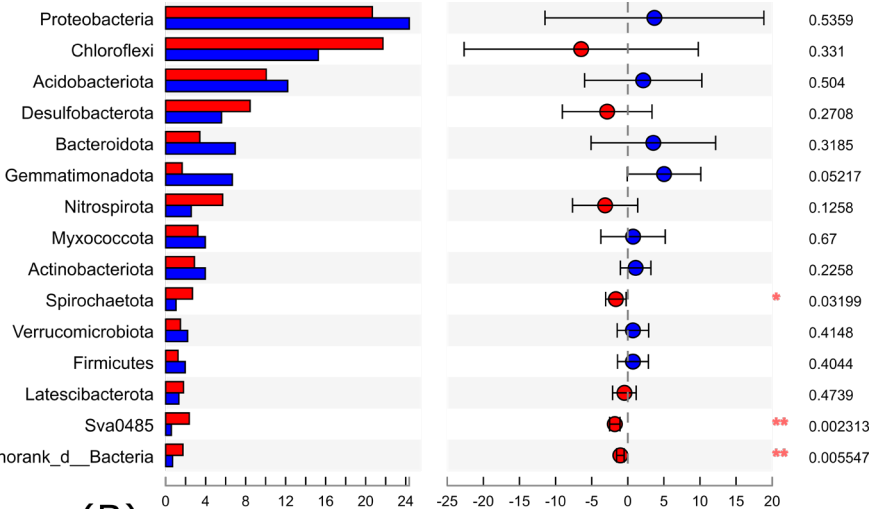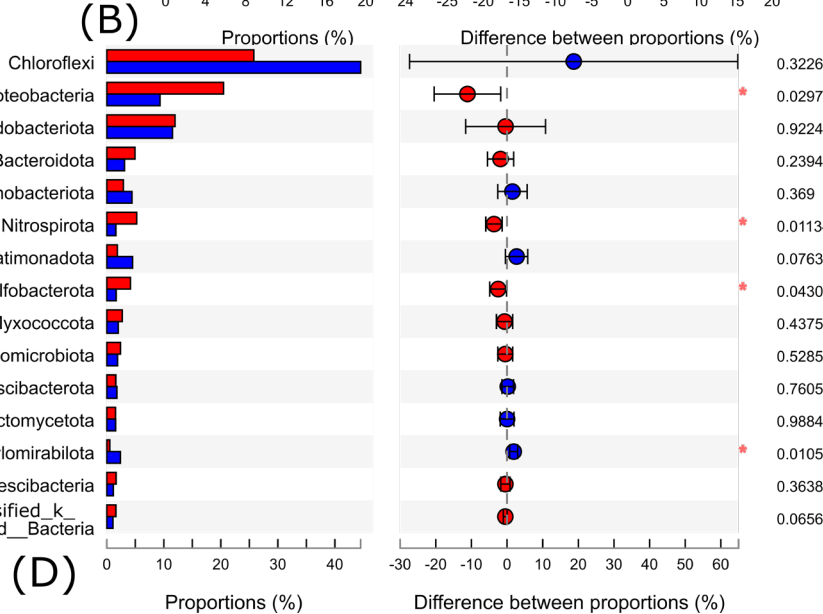

1

2

3

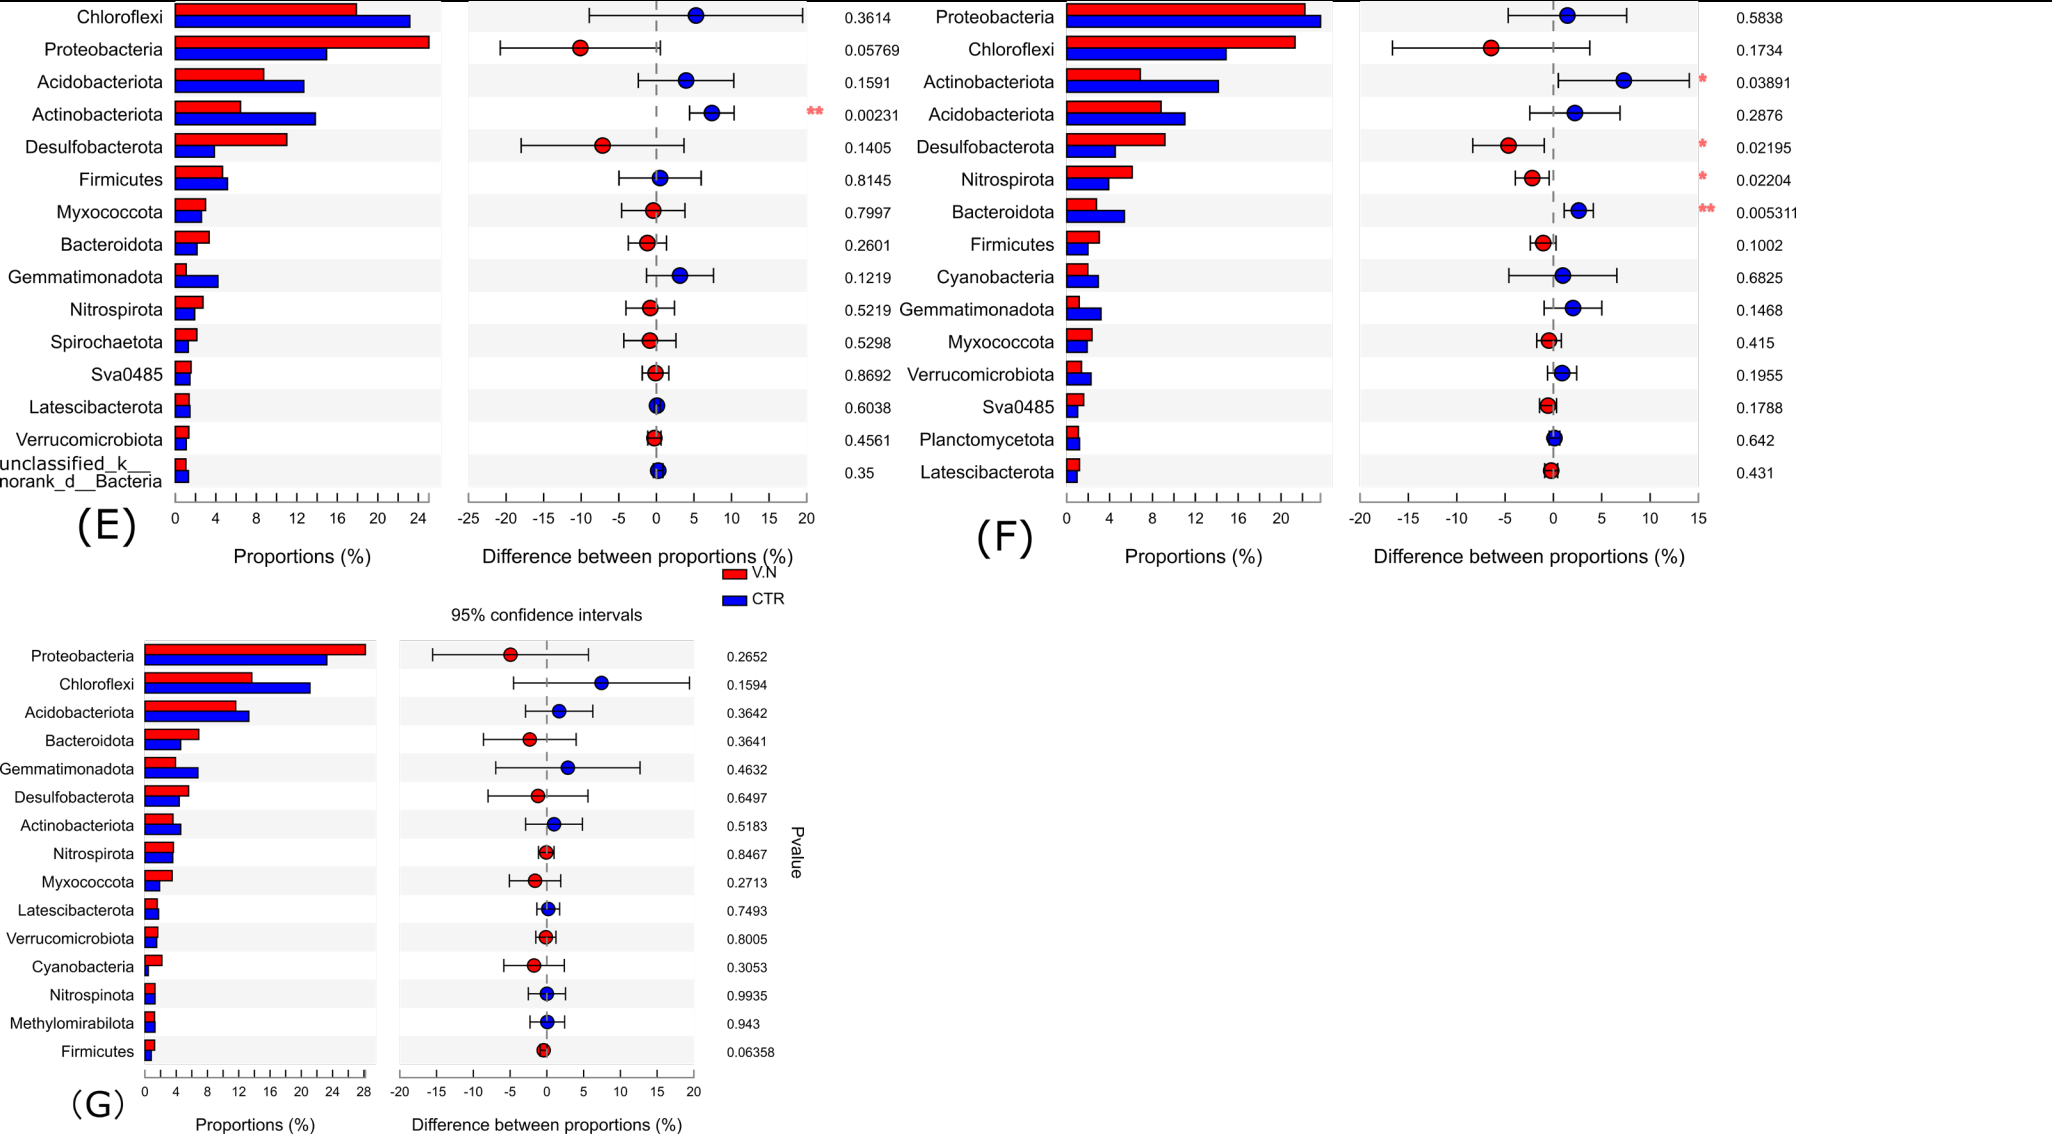

Figure S2 Bacterial phyla with significant difference in relative abundance between lake sediment samples with (V.N) and without (CTR) *V. natans* at different time points. A, January; B,

March; C, May; D, July; E, September; F, October; G, December  
\*,  $p < 0.05$ , \*\*,  $p < 0.01$ , and \*\*\*,  $p < 0.001$ .
